# Supplementary material for: Platinum-Containing Nanoparticles on N-Doped Carbon Supports as an Advanced Electrocatalyst for the Oxygen Reduction Reaction
Source: MDPI journal article supplement (doi:10.3390/catal12040414), 2022-04-07
Supplement: s1 [file s1]

# Platinum-Containing Nanoparticles on N-Doped Carbon Supports as an Advanced Electrocatalyst for the Oxygen Reduction Reaction

Anastasia Alekseenko <sup>1,\*</sup>, Angelina Pavlets <sup>1</sup>, Elizaveta Moguchikh <sup>1</sup>, Mikhail Tolstunov <sup>1</sup>, Evgeny Gribov <sup>2</sup>, Sergey Belenov <sup>1,3</sup> and Vladimir Guterman <sup>1</sup>

<sup>1</sup> Faculty of Chemistry, Southern Federal University, 7 Zorge St, 344090 Rostov-on-Don, Russia; pavlec@sfedu.ru (A.P.); moguchih@sfedu.ru (E.M.); mtolstunov@sfedu.ru (M.T.); sbelenov@sfedu.ru (S.B.); guter@sfedu.ru (V.G.)

<sup>2</sup> Boreskov Institute of Catalysis SB RAS, 5 Lavrentiev Ave., 630090 Novosibirsk, Russia; gribov@catalysis.ru

<sup>3</sup> Prometheus R&D LLC, 4g/36 Zhmaylova St, 344091 Rostov-on-Don, Russia

\* Correspondence: aalekseenko@sfedu.ru

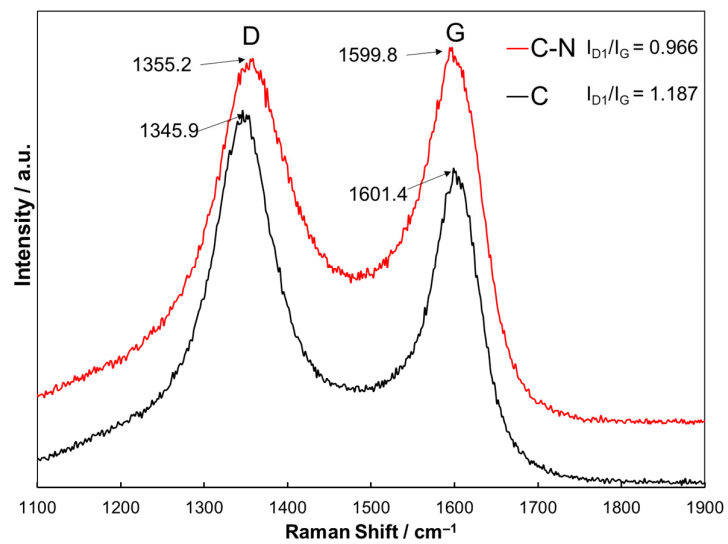

**Figure S1.** Raman spectra of undoped and N-doped carbons materials.

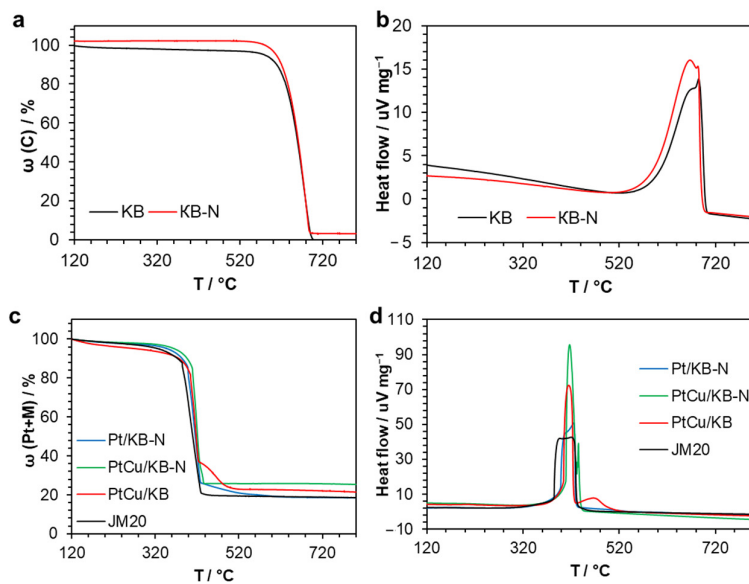

**Figure S2.** (a, c) TGA and (b, d) DSC curves of carbon support (a, b) and catalysts (c, d) oxidation.

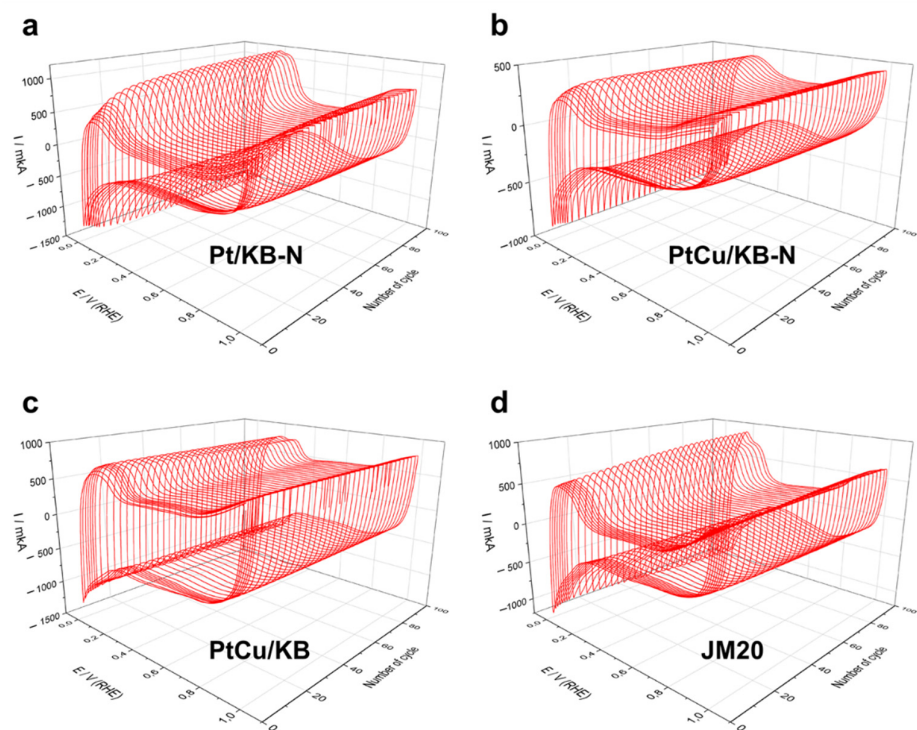

**Figure S3.** CVs at the stage of catalysts electrochemical activation: Pt/KB-N(a), PtCu/KB-N(b), PtCu/KB(c), JM20(d). The sweep rate of the potential is  $100 \text{ mV s}^{-1}$ .

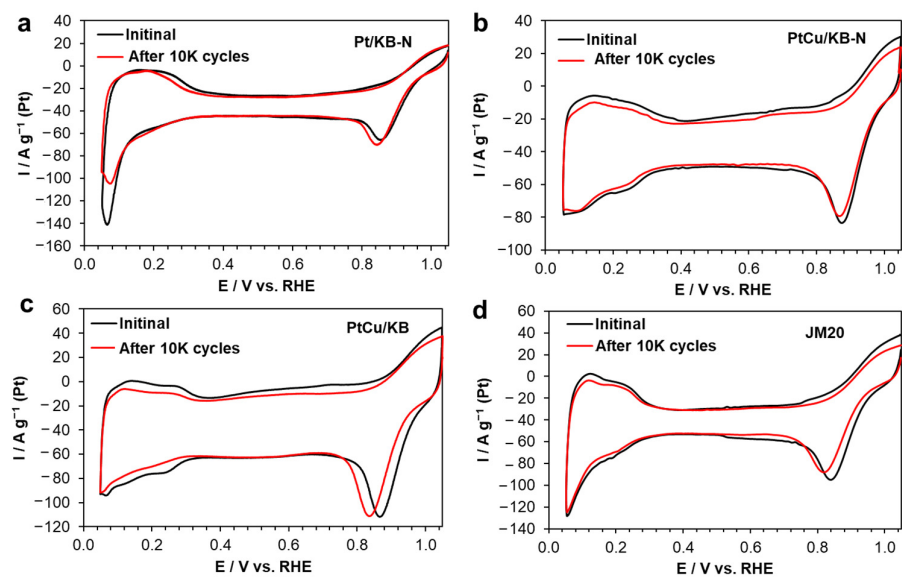

**Figure S4.** CVs: initial and after the stress test in oxygen atmosphere: Pt/KB-N(a), PtCu/KB-N(b), PtCu/KB(c), JM20(d). Electrolyte is  $0.1 \text{ M HClO}_4$ . Black - initial curves; Red - end curves.

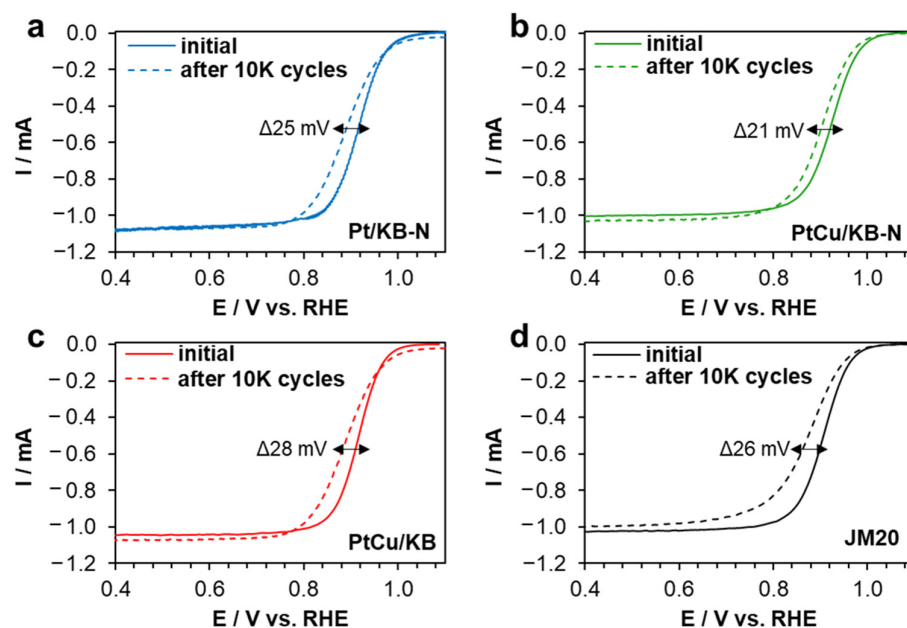

**Figure S5.** LSV ORR curves before and after the stress test: Pt/KB-N(a), PtCu/KB-N(b), PtCu/KB(c), JM20(d). Rotation speed of RDE is 1600 rpm. Electrolyte is 0.1 M  $\text{HClO}_4$ .

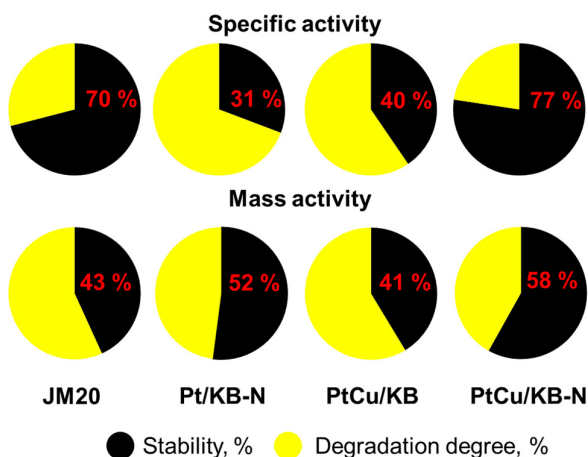

**Figure S6.** Relative stability and degradation degree of such parameters: mass and specific activity of obtained and commercial samples. The red color indicates the calculated value of corresponding stability for each sample.
